# Supplementary material for: Effect of full flavor and denicotinized cigarettes exposure on the brain microvascular endothelium: a microarray-based gene expression study using a human immortalized BBB endothelial cell line
Source: PubMed Central journal article supplement (PMC4477310; doi:10.1186/s12868-015-0173-3), 2015-06-23
Supplement: 12868_2015_173_MOESM1_ESM.pdf [file 12868_2015_173_MOESM1_ESM.pdf]

**Table S1: Phase I Detoxification genes**

| Gene Short name | Gene Denomination                                                                       | Fold Change over control | SE    | p value | Fold Change over control | SE    | p value | Fold Change over control | SE     | p value |
|-----------------|-----------------------------------------------------------------------------------------|--------------------------|-------|---------|--------------------------|-------|---------|--------------------------|--------|---------|
|                 |                                                                                         | Nicotine                 |       |         | 3R4F (Full Flavor)       |       |         | Ultralow Nicotine        |        |         |
| NQO2            | NAD(P)H Dehydrogenase Quinone 2                                                         | 1.08                     | 0.037 | ns      | 1.18                     | 0.026 | *       | 1.28                     | 0.0471 | ***     |
| AKR1B1          | Aldo keto reductase family 1, member B1 (aldose reductase)                              | 1.00                     | 0.032 | ns      | 1.23                     | 0.023 | **      | 1.09                     | 0.061  | ns      |
| AKR1C3          | Aldo-keto reductase family 1, member C3 (3-alpha hydroxysteroid dehydrogenase, type II) | 0.78                     | 0.074 | ns      | 1.65                     | 0.086 | ns      | 1.79                     | 0.116  | ***     |
| CBR4            | Carbonyl reductase 4                                                                    | 0.93                     | 0.111 | ns      | 1.42                     | 0.114 | *       | 1.27                     | 0.055  | ns      |

**Table S1:** Effect of CSE on gene array studies of other genes belonging to Phase I detoxification such as NQO2, AKR1B1, AKR1C3 and CBR4. Data were expressed as mean  $\pm$  SEM (fold change over control).

\*p<0.05, \*\*p<0.01, \*\*\*p<0.001 vs. control. n=6

**Table S2: Phase II Detoxification genes**

| Gene Short name | Gene Denomination                                  | Fold Change over control | SE    | p value | Fold Change over control | SE    | p value | Fold Change over control | SE    | p value |
|-----------------|----------------------------------------------------|--------------------------|-------|---------|--------------------------|-------|---------|--------------------------|-------|---------|
|                 |                                                    | Nicotine                 |       |         | 3R4F (Full Flavor)       |       |         | Ultralow Nicotine        |       |         |
| GSTA4           | Homo sapiens glutathione S-transferase A4          | 0.89                     | 0.057 | ns      | 1.36                     | 0.076 | *       | 1.44                     | 0.131 | **      |
| GSTM2           | Homo sapiens glutathione S-transferase M2 (muscle) | 0.94                     | 0.038 | ns      | 1.26                     | 0.041 | **      | 1.27                     | 0.041 | ***     |

**Table S2:** Effect of CSE on gene array studies of other genes belonging to Phase II detoxification related genes such as GSTA1 and GSTM2. Data were expressed as mean  $\pm$  SEM (fold change over control).

\*p<0.05, \*\*p<0.01, \*\*\*p<0.001 vs. control. n=6

**Table S3: Genes Involved in ABC Efflux Transporters**

| Gene Short name | Gene Denomination                                                                                           | Fold Change over control | SE    | p value | Fold Change over control | SE    | p value | Fold Change over control | SE    | p value |
|-----------------|-------------------------------------------------------------------------------------------------------------|--------------------------|-------|---------|--------------------------|-------|---------|--------------------------|-------|---------|
|                 |                                                                                                             | Nicotine                 |       |         | 3R4F (Full Flavor)       |       |         | Ultralow Nicotine        |       |         |
| ABCA1           | ATP-binding cassette, sub-family A (ABC1), member 1                                                         | 0.99                     | 0.102 | ns      | 1.33                     | 0.094 | *       | 1.12                     | 0.043 | ns      |
| ABCA3           | ATP-binding cassette, sub-family A (ABC1), member 3                                                         | 0.85                     | 0.106 | ns      | 1.20                     | 0.063 | *       | 1.04                     | 0.061 | ns      |
| ABCB6           | ATP-binding cassette, sub-family B (MDR/TAP), member 6 (ABCB6), nuclear gene encoding mitochondrial protein | 0.88                     | 0.065 | ns      | 1.31                     | 0.094 | *       | 1.27                     | 0.019 | *       |
| ABCG1           | ATP-binding cassette, sub-family G (WHITE), member 1 (ABCG1), transcript variant 2                          | 0.97                     | 0.067 | ns      | 1.27                     | 0.065 | *       | 1.15                     | 0.035 | ns      |

**Table S3:** Effect of CSE on gene array studies of other genes belonging to ABC efflux transporters involved in cholesterol efflux. Data were expressed as mean  $\pm$  SEM (fold change over control). \*p<0.05 vs. control. n=6

**Table S4: Genes Involved in NADPH Production**

| Gene Short name | Gene Denomination                                 | Fold Change over control | SE    | p value | Fold Change over control | SE    | p value | Fold Change over control | SE    | p value |
|-----------------|---------------------------------------------------|--------------------------|-------|---------|--------------------------|-------|---------|--------------------------|-------|---------|
|                 |                                                   | Nicotine                 |       |         | 3R4F (Full Flavor)       |       |         | Ultralow Nicotine        |       |         |
| IDH1            | Isocitrate dehydrogenase 1 (NADP+), soluble       | 0.98                     | 0.074 | ns      | 1.44                     | 0.037 | **      | 1.25                     | 0.104 | ns      |
| ME1             | Malicenzyme 1, NADP(+)-dependent, cytosolic       | 1.01                     | 0.180 | ns      | 1.62                     | 0.143 | *       | 1.59                     | 0.120 | *       |
| TKT             | Transketolase (Wernicke-Korsakoff syndrome) (TKT) | 0.90                     | 0.061 | ns      | 1.47                     | 0.082 | ***     | 1.28                     | 0.077 | *       |
| UGDH            | UDP-glucose dehydrogenase                         | 1.02                     | 0.146 | ns      | 1.48                     | 0.109 | *       | 1.43                     | 0.066 | *       |

**Table S4:** Effect of CSE on gene array studies of other genes belonging to NADPH production. Data were expressed as mean  $\pm$  SEM (fold change over control). \*p<0.05, \*\*p<0.01, \*\*\*p<0.001 vs. control. n=6

**Table S5: Primer sequences used in real time qRT-PCR**

| Target gene    | Forward                    | Reverse                    |
|----------------|----------------------------|----------------------------|
| Nrf2           | CGGTATGCAACAGGACATTG       | AGGATGCTGCTGAAGGAATC       |
| NQO1           | TGATCGTACTGGCTCACTCA       | GTCAGTTGAGGTTCTAAGAC       |
| P-gp (ABCB1)   | GCT CCT GAC TAT GCC AAA GC | TCT TCA CCT CCA GGC TCA GT |
| MRP-4 (ABCC4)  | TGA TGA GCC GTA TGT TTT GC | CTT CGG AAC GGA CTT GAC AT |
| CYP2S1         | ACCCCAACCACTTGTCCACACA     | TGAGGGTCCTCGTATGTCCAAAG    |
| CYP51A1        | CTACAGTCGCCTGACAACAC       | CCACTTTCTCCCAACTCTC        |
| SLC7A11        | GGTGGTGTGTTTGCTGTC         | GCTGGTAGAGGAGTGTGC         |
| GCLC           | AAGCCATTCACTCCAGATTTTACC   | ACAACAACTTCAACGCAAAGC      |
| GCLM           | ACTGACTTAGGAGCATAACTTACC   | AAGAATATCTGCCTCAATGACACC   |
| HO-1           | CCAGCCATGCAGCACTATGT       | AGCCCTACAGCAACTGTCGC       |
| NFkB p65       | ACT GTT CCC CCT CAT CTT CC | TGG TCC TGT GTA GCC ATT GA |
| $\beta$ -actin | CTGGCCCGGACCTGACAGA        | GCCGCAGTGCCATCTCTT         |

**Table S5:** This includes Forward and reverse primer sequences (5' -3') used in real time qRT-PCR
